# Supplementary material for: BUMPER v1.0: a Bayesian user-friendly model for palaeo-environmental reconstruction
Source: Copernicus journal article supplement (doi:10.5194/gmd-10-483-2017), 2017-02-01
Supplement: Supplementary file 1 [file gmd-10-483-2017-supplement.zip]

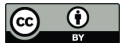

## *Supplement of*

# **BUMPER v1.0: a Bayesian user-friendly model for palaeo-environmental reconstruction**

**Philip B. Holden et al.**

*Correspondence to:* Philip B. Holden ([philip.holden@open.ac.uk](mailto:philip.holden@open.ac.uk))

- [gmd-10-483-2017-supplement-title-page.pdf](#)
- [BUMPER1P0.F90](#)
- [BUMPERpp.R](#)
- [MB16.core.counts](#)
- [MB16.lakes](#)
- [MB16.species](#)
- [MB16.ts.counts](#)

The copyright of individual parts of the supplement might differ from the CC-BY 3.0 licence.
